# Supplementary material for: Gut microbiota differs between treatment outcomes early after fecal microbiota transplantation against recurrent Clostridioides difficile infection
Source: PubMed Central journal article supplement (PMC9176232; doi:10.1080/19490976.2022.2084306), 2022-06-05
Supplement: KGMI_A_2084306_SM3864.pdf [file KGMI_A_2084306_SM3864.pdf]

1 **Supplementary materials**

2

3 **Gut microbiota differs between treatment outcomes early after fecal microbiota**  
4 **transplantation against recurrent *Clostridioides difficile* infection**

5

6 Shaodong Wei<sup>1</sup>, Martin Iain Bahl<sup>1</sup>, Simon Mark Dahl Baunwall<sup>2</sup>, Jens Frederik Dahlerup<sup>2</sup>,  
7 Christian Lodberg Hvas<sup>2</sup>, Tine Rask Licht<sup>1,\*</sup>

8

9 **Affiliations:**

10 <sup>1</sup>National Food Institute, Technical University of Denmark, Kemitorvet 202, 2800 Kgs  
11 Lyngby, Denmark

12 <sup>2</sup>Department of Hepatology and Gastroenterology, Aarhus University Hospital, Aarhus,  
13 Denmark

14

15 \*For correspondence: [trli@food.dtu.dk](mailto:trli@food.dtu.dk)

16

17 **Supplementary figures and tables**

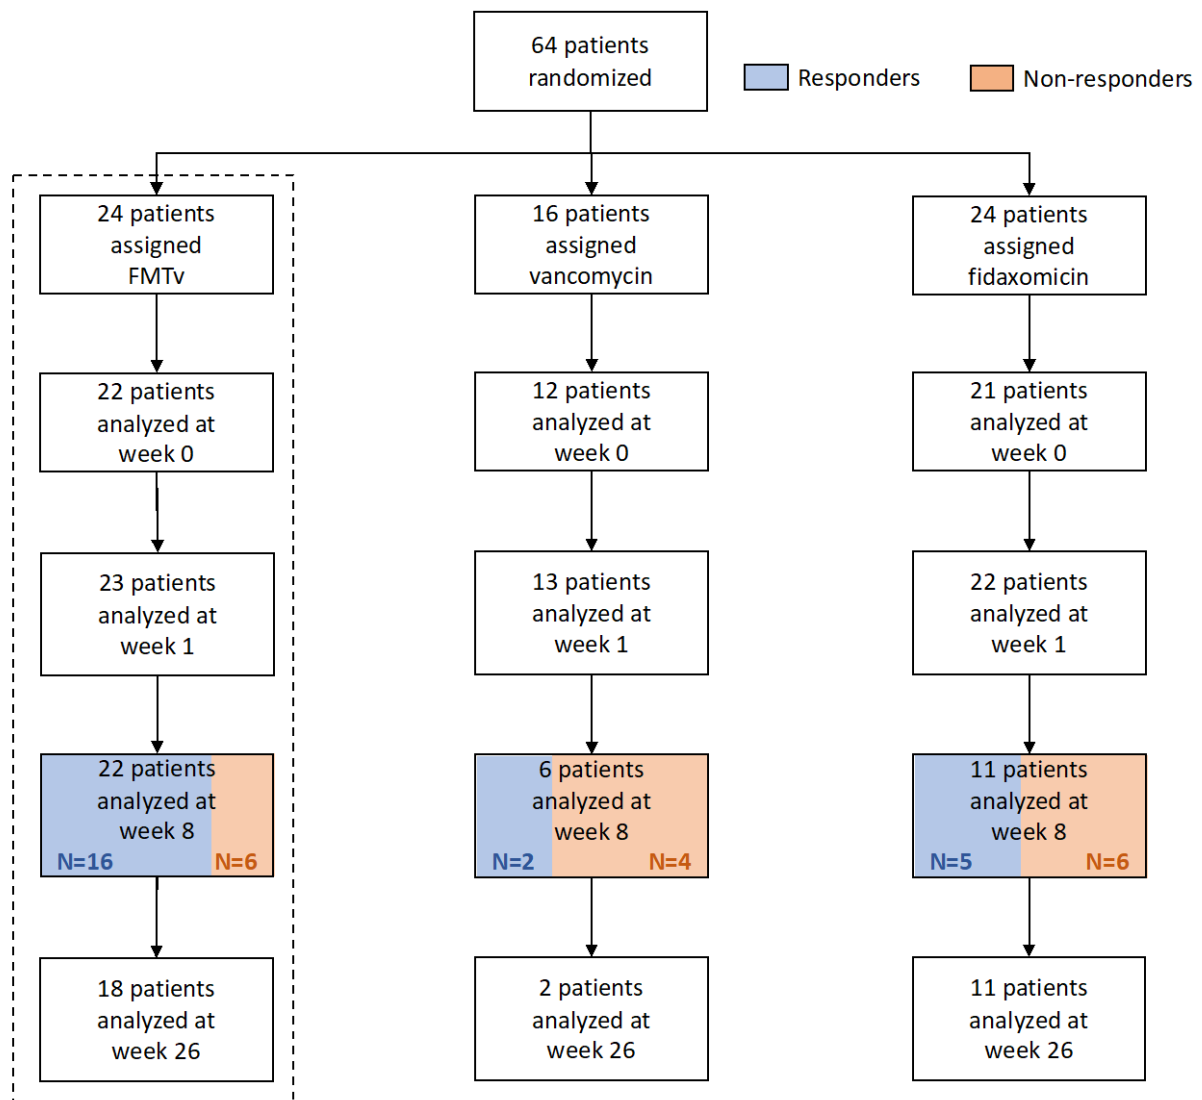

18

19

20 **Figure S1. Study design of the clinical trial.** Patients were randomly allocated to three  
 21 treatment arms, namely FMTv (FMT preceded by vancomycin), fidaxomicin, and vancomycin.  
 22 FMTv group was used to assess the effect of FMT on the gut microbiota and is highlighted  
 23 with a box in dashed lines. The vancomycin and fidaxomicin groups were used to compare the  
 24 outcome-associated changes induced by FMT to those induced by antibiotic treatment. Fecal  
 25 samples were collected before any treatments (FMTv or antibiotics) (W0), and 1 (W1), 8 (W8),  
 26 and 26 weeks (W26) after treatments. Blue and orange colors refer to responders and non-  
 27 responders at W8, respectively. Outcomes were determined based on combined clinical  
 28 resolution and a negative PCR test. The width of blue and orange colors is proportional to the  
 29 number of patients within each outcome.

30

31

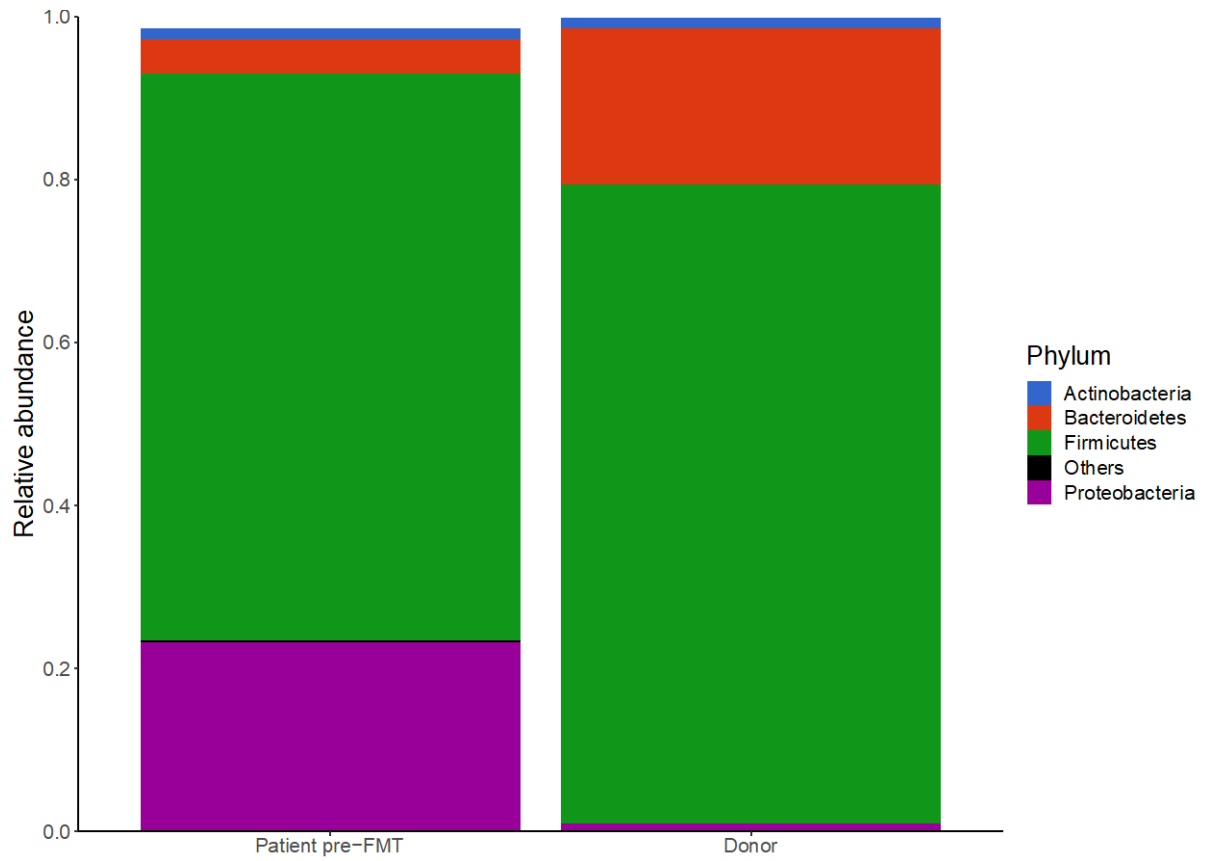

32  
33

34 **Figure S2. Relative abundance of the top four most abundant phyla in patients pre-FMT**  
35 **and in donors.** The four most abundant phyla are colored as indicated, and the less abundant  
36 phyla are merged as “Others”.  
37

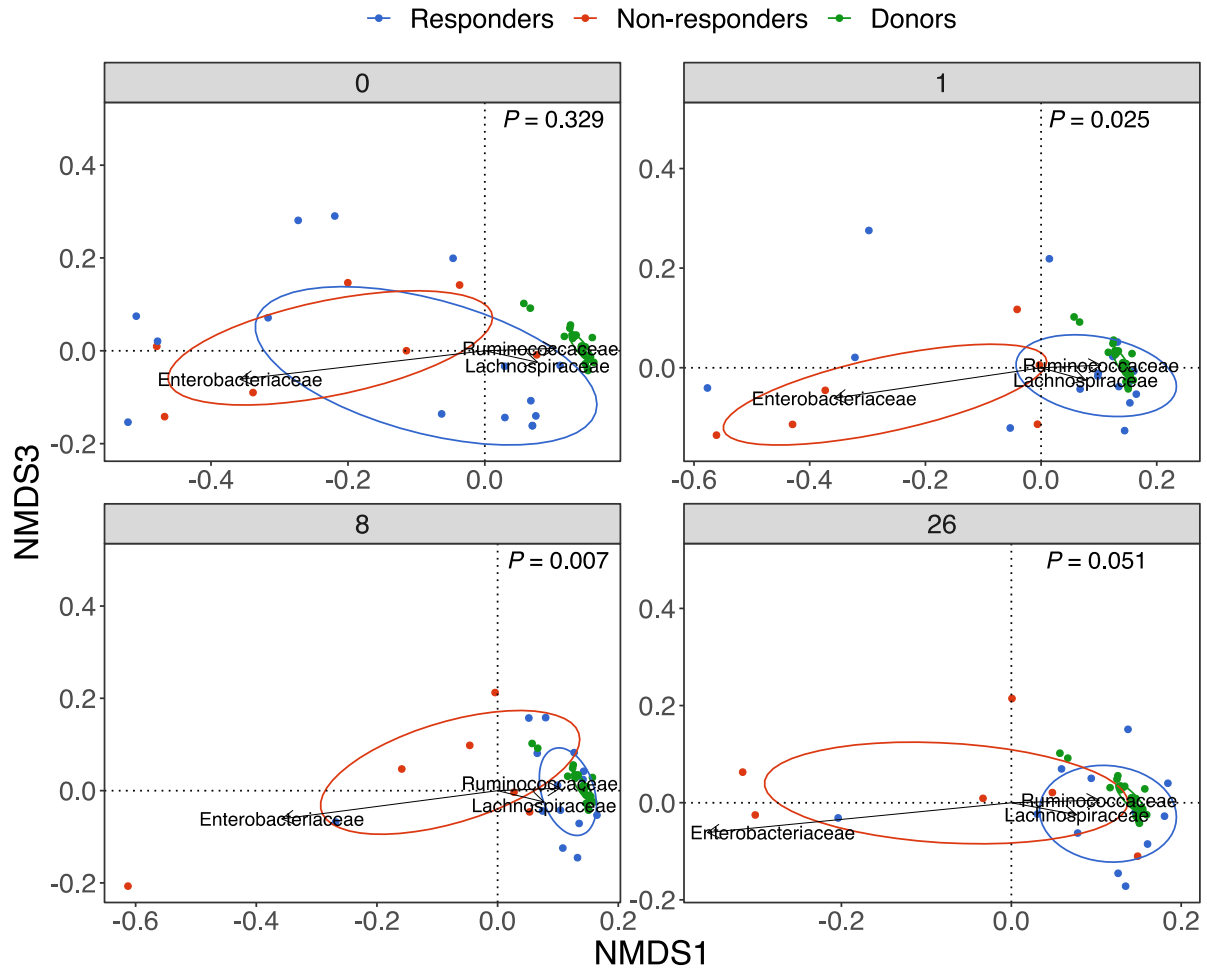

38

39

40 **Figure S3. Beta diversity of samples and taxa estimated with Bray-Curtis distance and**  
 41 **visualized with nonmetric multidimensional scaling (NMDS) ordination.** Bray-Curtis  
 42 distance was estimated at the family level. Dots are samples colored differently according to  
 43 their outcomes with ellipses indicating 50% confidence regions for clusters. Arrows point to  
 44 the families directing the effect and the arrow lengths indicate the strength of the association.  
 45 Comparison of beta diversity between outcomes was performed with permutational  
 46 multivariate analysis of variance (PERMANOVA) with 10,000 iterations.

47

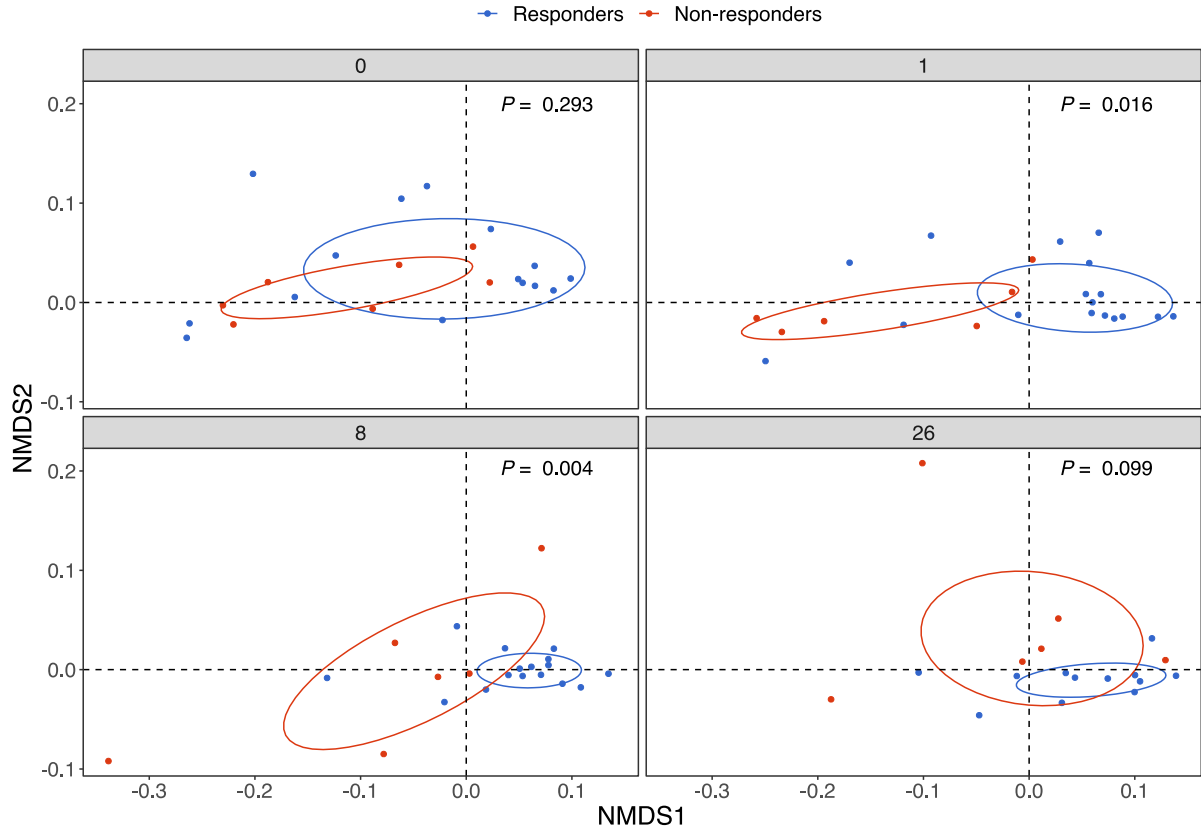

48

49

50 **Figure S4. Beta diversity of functional potential estimated with PICRUST2 based on Bray-**  
 51 **Curtis distance and visualized with NMDS ordination.** The analysis was performed with  
 52 permutational multivariate analysis of variance (PERMANOVA) with 10,000 iterations.

53

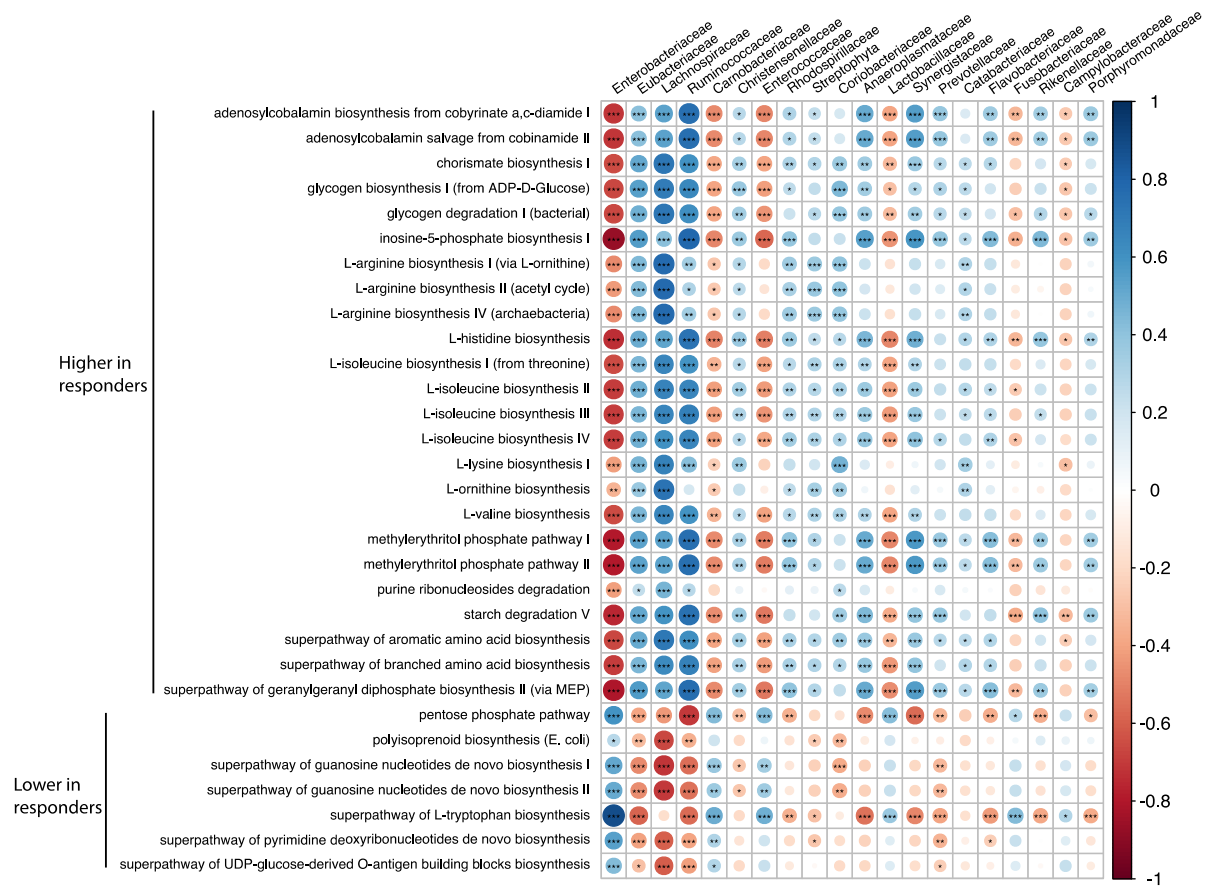

54  
 55  
 56  
 57  
 58  
 59  
 60  
 61  
 62

**Figure S5. Correlations between the relative abundances of families and MetaCyc pathways.** Blue color indicates positive Spearman's rank-order correlation coefficient and red color indicates negative correlations. The abundance of pathway labelled “Higher in responders” is more abundant in responders and the one labelled “Lower in responders” is less abundant in responders. The stars for each correlation refers to the significance level: \*,  $0.01 < P < 0.05$ ; \*\*,  $0.001 < P < 0.01$ ; \*\*\*,  $P < 0.001$ .

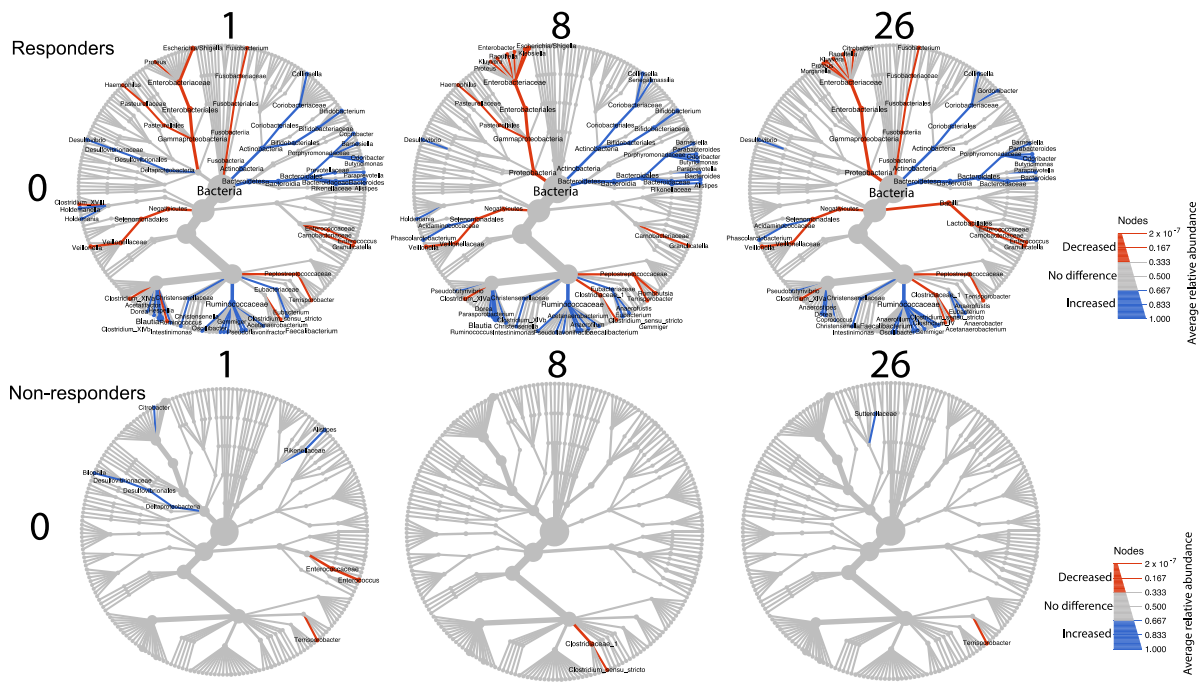

63  
 64  
 65  
 66  
 67  
 68  
 69  
 70  
 71  
 72

**Figure S6. Tree plots of discriminant taxa as compared to pre-FMT.** Comparisons were performed between post-FMT and pre-FMT samples within each outcome. The smallest nodes represent the genus level and the node in the center represents the kingdom bacteria. Node sizes are proportional to the mean relative abundance at the given phylogenetic level. Nodes with labels have significantly different relative abundances between time points, where the blue color indicates the taxa have increased over time, red color indicates decreased abundances, and grey color indicates no significant changes in abundances.

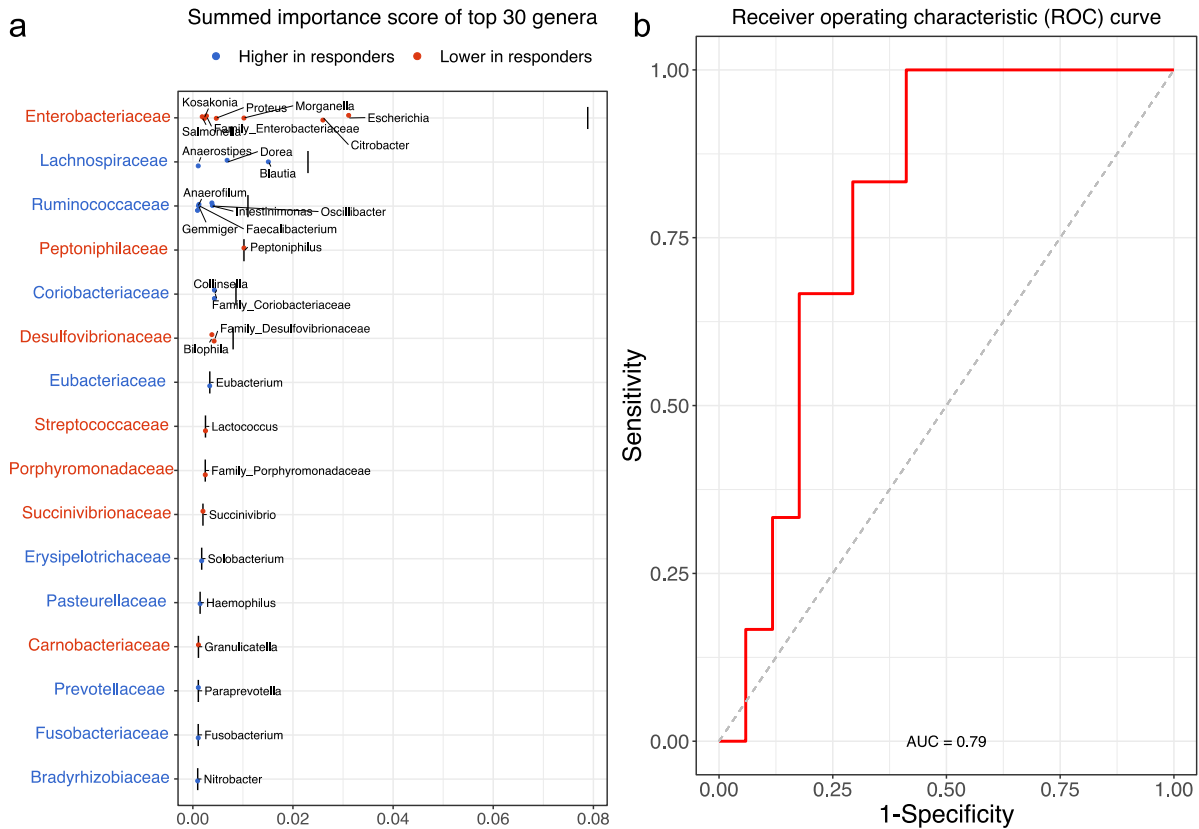

73

74

75 **Figure S7. Importance and receiver operating characteristic (ROC) curve obtained by**

76 **random forest modelling.** (a) The top 30 most important genera are shown and their

77 importance scores are summed (the black vertical line) based on the family they belonged to in

78 descending order. Colors specify higher or lower abundances of corresponding families

79 between outcomes. The variable ‘importance’ is obtained from the random forest model built

80 based on the samples at week 1, *via* 10-fold cross validation with 100 iterations. (b) The ROC

81 curve describing the ability of the model to differentiate outcomes when applied at different

82 levels of sensitivity (true positive rate) and specificity (true negative rate). Area under the ROC

83 curve (AUC) is used to measure the discriminatory power of the model (AUC 0.79).

84



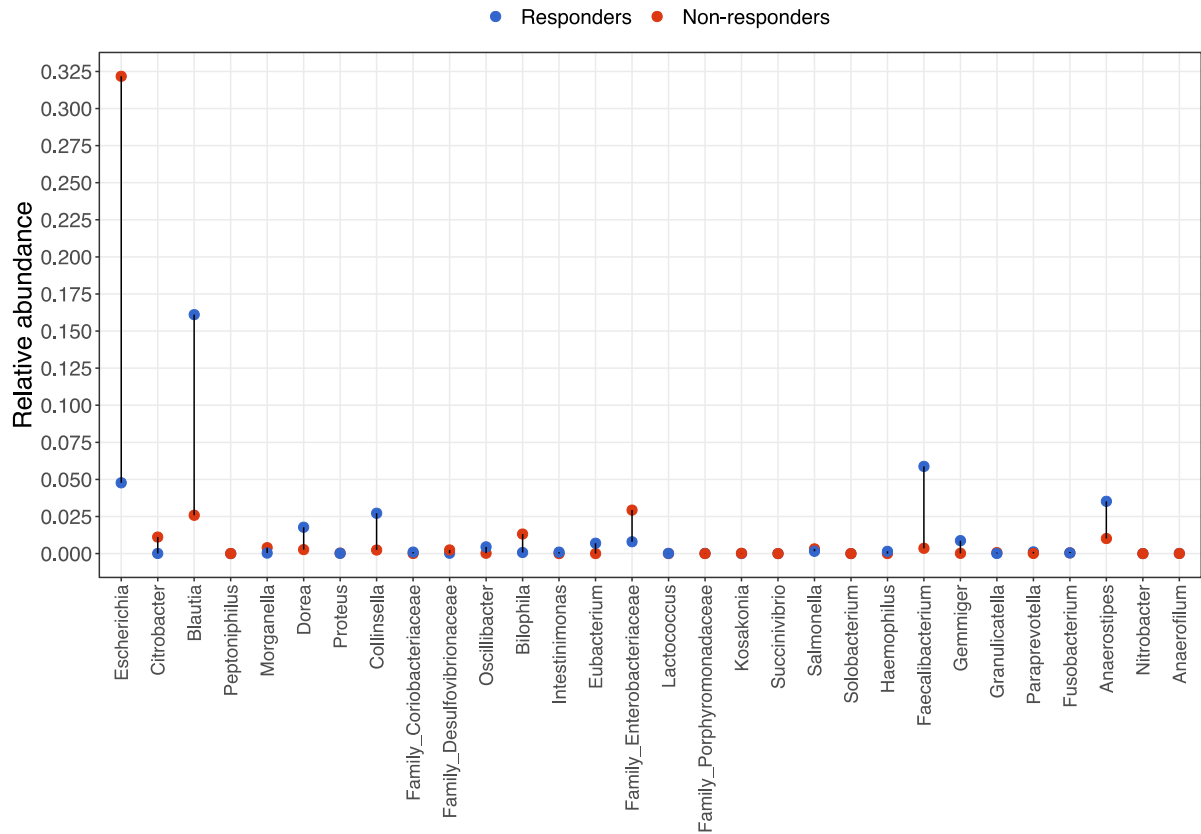

85  
 86 **Figure S8. Relative abundances of the top 30 most important genera at differentiating**  
 87 **outcomes identified by random forest modelling.** The X axis lists the genera in a descending  
 88 order from left to right according to importance. Colors refer to outcomes.  
 89

90

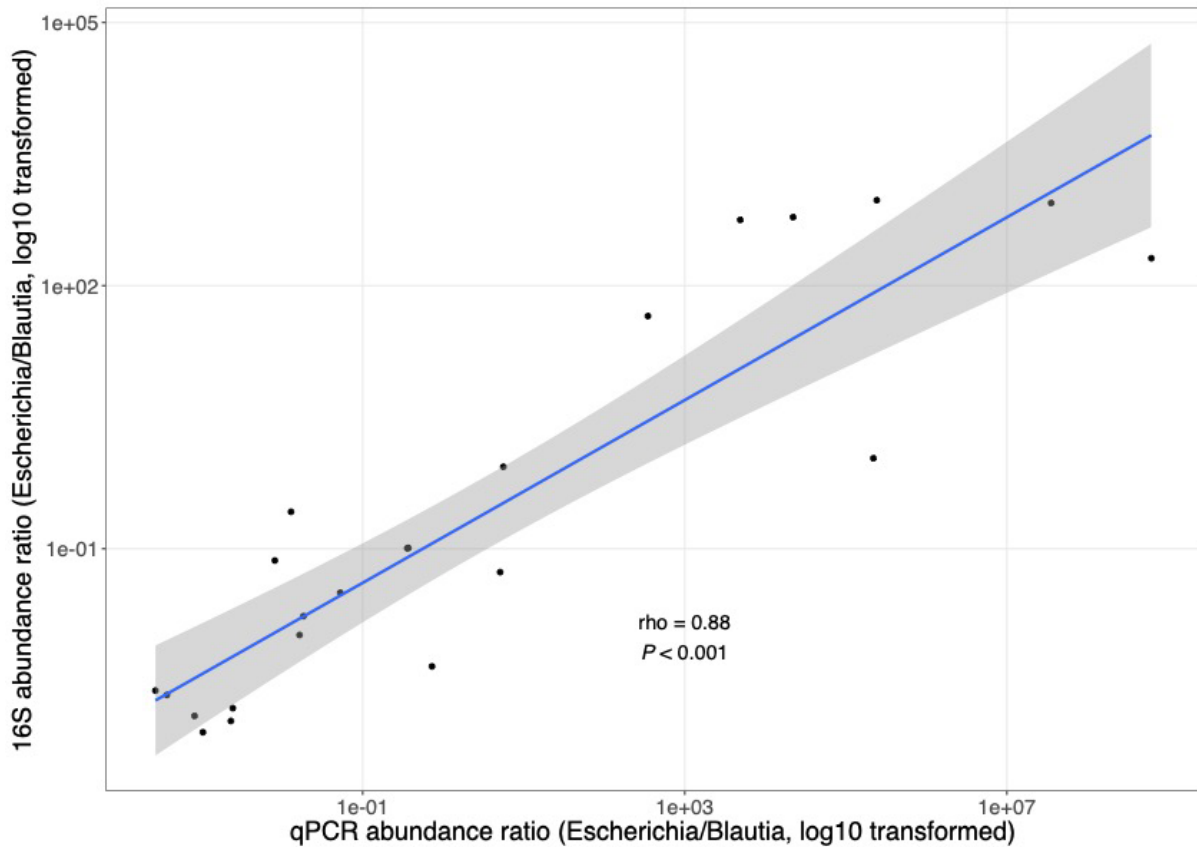

91

92

93 **Figure S9. Correlation between the abundance ratios (*Escherichia* to *Blautia*) determined**

94 **by qPCR and 16S.** The X and Y axis is the abundance ratio determined by qPCR and 16S

95 respectively, and log10 transformed for visualization. The strength of correlation is calculated

96 using the non-parametric Spearman's rank-order correlation coefficient.

97

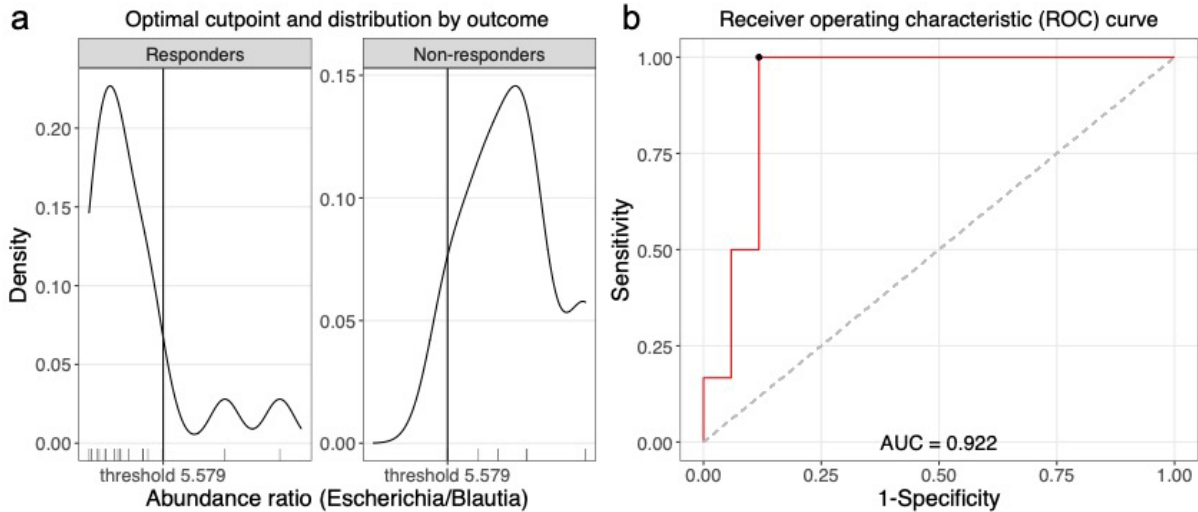

99

100

101 **Figure S10. Prediction of outcomes based on the abundance ratio between *Escherichia***

102 **and *Blautia* at week 1. (a) The distribution of abundance ratios between genus *Escherichia***

103 **and *Blautia* for each outcome determined by qPCR. The optimal threshold of abundance ratios**

104 **that best differentiated outcomes was obtained by the Youden's J statistic and calculated to be**

105 **5.6, where a larger value of abundance ratio than 5.6 is indicative of treatment failure. A**

106 **prediction accuracy of 91.3% was obtained based on the chosen threshold. (b) The ROC curve**

107 **describing the ability of the model to differentiate outcomes when applied at different levels of**

108 **sensitivity (true positive rate) and specificity (true negative rate). Area under the ROC curve**

109 **(AUC) is used to measure the discriminatory power of the model (AUC 0.922).**

110

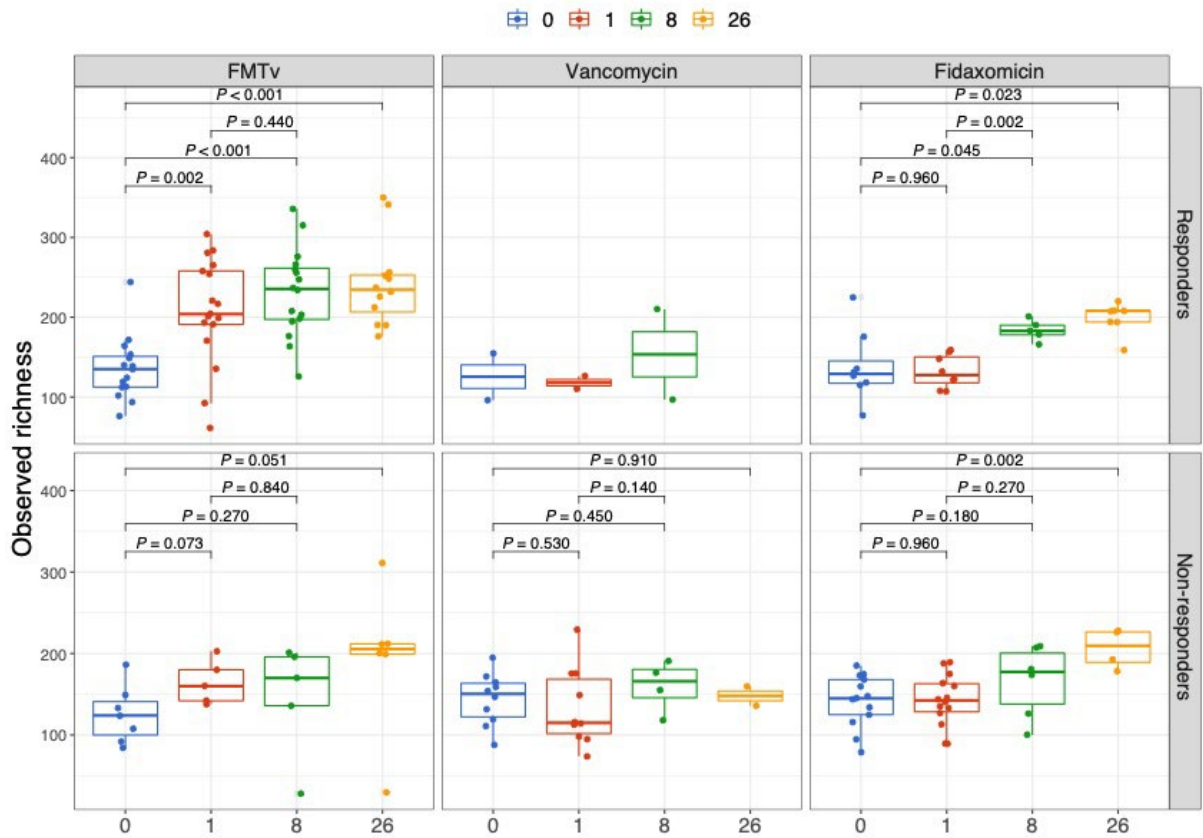

112

113

114 **Figure S11. Observed richness for FMTv, vancomycin, and fidaxomicin treatments over**

115 **time, stratified by outcomes.** Boxplot is used to show the distribution of richness. The median

116 richness is compared with the Wilcoxon rank sum test.

117

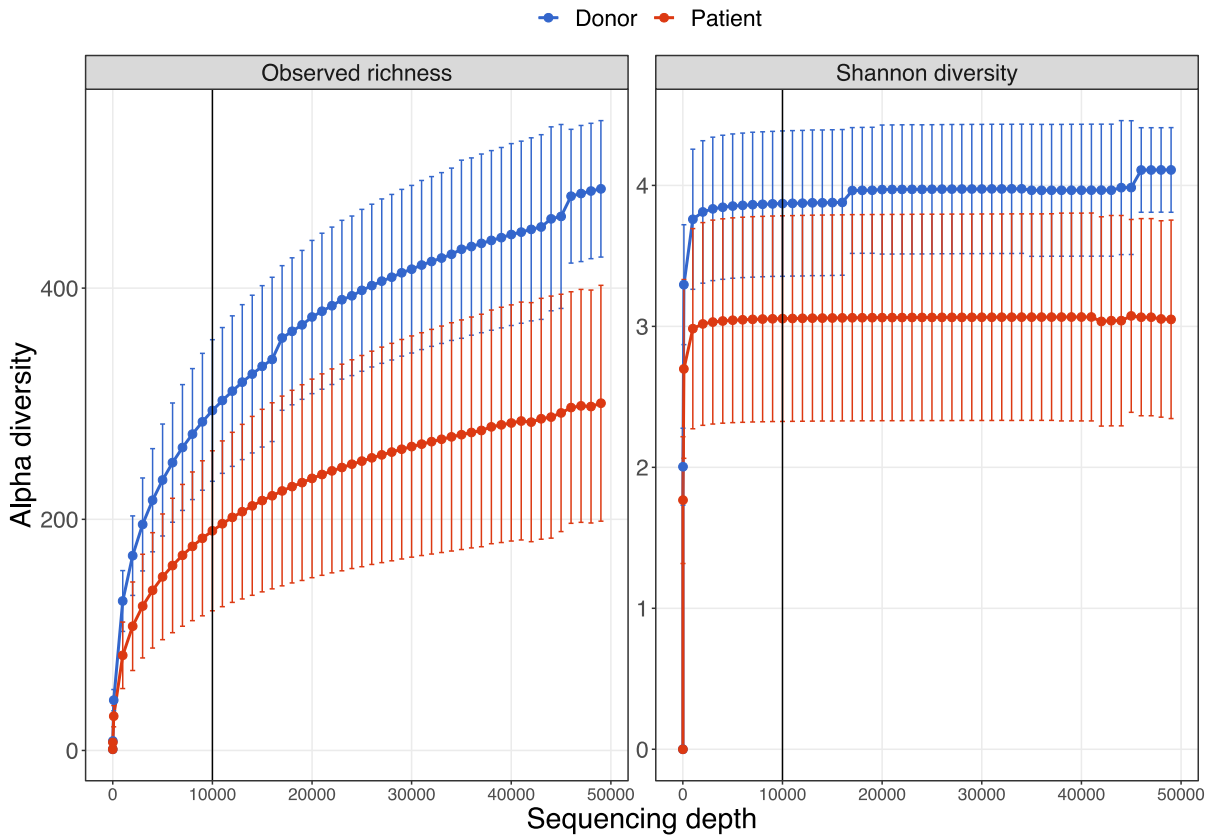

119

120

121 **Figure S12. Rarefaction curve for observed richness and Shannon diversity for samples**

122 **from the FMTv treatment. Donors (blue) are higher in alpha diversity than patients (red).**

123 Although the richness did not reach saturation before 50,000 reads, Shannon diversity was

124 close to maximum after 2,000 reads. The black vertical lines mark the sequencing depth of

125 10,000 reads, which is the depth used for rarefaction before calculating alpha diversity. Dots

126 represent the means of alpha diversity in corresponding sample types. Error bars show the

127 standard deviation of alpha diversity obtained from 100 random rarefactions at the

128 corresponding sequencing depth.

129

130 **Table S1. Comparison of Bray-Curtis distance between time points or donors within each**  
 131 **outcome for FMTv treatment.**

132  
 133

| <b>Time</b> | <b>Outcome</b> | <b><i>P<sub>adj</sub></i></b> |
|-------------|----------------|-------------------------------|
| 0-1         | Responders     | <b>0.002</b>                  |
| 0-1         | Non-responders | 0.612                         |
| 0-8         | Responders     | <b>0.002</b>                  |
| 0-8         | Non-responders | 0.077                         |
| 0-26        | Responders     | <b>0.002</b>                  |
| 0-26        | Non-responders | 0.117                         |
| 1-8         | Responders     | 0.961                         |
| 1-8         | Non-responders | 0.147                         |
| 1-26        | Responders     | 0.889                         |
| 1-26        | Non-responders | 0.153                         |
| 8-26        | Responders     | 0.961                         |
| 8-26        | Non-responders | 0.961                         |
| 0-Donor     | Responders     | 0.258                         |
| 0-Donor     | Non-responders | 0.258                         |
| 1-Donor     | Responders     | 0.385                         |
| 1-Donor     | Non-responders | 0.258                         |
| 8-Donor     | Responders     | 0.258                         |
| 8-Donor     | Non-responders | 1.000                         |
| 26-Donor    | Responders     | 0.258                         |
| 26-Donor    | Non-responders | 0.385                         |

134  
 135  
 136  
 137  
 138  
 139

The comparison was performed between time points or between time and donor for each outcome. Permutational multivariate analysis of variance (PERMANOVA, 10,000 permutations) was used to test the comparison. *P* values adjusted with the Benjamini-Hochberg method are shown as *P<sub>adj</sub>*. Significant *P<sub>adj</sub>* values are in bold.

140 **Table S2. Comparison of Bray-Curtis distances between time points within each outcome**  
 141 **for vancomycin and fidaxomicin treatments.**

142

| <b>Time</b> | <b>Outcome</b> | <b>Treatment</b> | <b><math>P_{adj}</math></b> |
|-------------|----------------|------------------|-----------------------------|
| 0-1         | Responders     | Vancomycin       | 1.000                       |
| 0-1         | Non-responders | Vancomycin       | 0.441                       |
| 0-8         | Responders     | Vancomycin       | 1.000                       |
| 0-8         | Non-responders | Vancomycin       | 0.541                       |
| 0-26        | Non-responders | Vancomycin       | 0.590                       |
| 1-8         | Responders     | Vancomycin       | 1.000                       |
| 1-8         | Non-responders | Vancomycin       | 0.441                       |
| 1-26        | Non-responders | Vancomycin       | 0.674                       |
| 8-26        | Non-responders | Vancomycin       | 1.000                       |
| 0-1         | Responders     | Fidaxomicin      | 1.000                       |
| 0-1         | Non-responders | Fidaxomicin      | 1.000                       |
| 0-8         | Responders     | Fidaxomicin      | 0.749                       |
| 0-8         | Non-responders | Fidaxomicin      | 0.590                       |
| 0-26        | Responders     | Fidaxomicin      | 0.541                       |
| 0-26        | Non-responders | Fidaxomicin      | 0.441                       |
| 1-8         | Responders     | Fidaxomicin      | 1.000                       |
| 1-8         | Non-responders | Fidaxomicin      | 0.928                       |
| 1-26        | Responders     | Fidaxomicin      | 0.830                       |
| 1-26        | Non-responders | Fidaxomicin      | 0.593                       |
| 8-26        | Responders     | Fidaxomicin      | 1.000                       |
| 8-26        | Non-responders | Fidaxomicin      | 1.000                       |

143 The comparison was performed between time points within each outcome. Permutational  
 144 multivariate analysis of variance (PERMANOVA, 10,000 permutations) was used to test the  
 145 comparison.  $P$  values adjusted with the Benjamini-Hochberg method are shown as  $P_{adj}$ .

146
